# Supplementary material for: Development, acceptability and construct validity of the Aboriginal Women’s Experiences of Partner Violence Scale (AEPVS): a co-designed, multiphase study nested within an Australian Aboriginal and Torres Strait Islander birth cohort
Source: PubMed Central journal article supplement — BMJ Open. 2022 Aug 25;12(8):e059576. doi: 10.1136/bmjopen-2021-059576 (PMC9422811; doi:10.1136/bmjopen-2021-059576), 2022-08-25
Supplement: bmjopen-2021-059576supp001.pdf [file bmjopen-2021-059576supp001.pdf]

## Appendix 1: Aboriginal Women's Experience of Partner Violence Scale (AEPVS)

The next few questions ask about partner violence. We know many Aboriginal women and men have healthy relationships, and it is women who usually have the main responsibility for looking after the health of family members. We also know a lot of women experience violence at home, and it affects their health.

The Aboriginal Advisory Group (researchers undertaking this study) want the study to give women an opportunity to talk about experiences of partner violence, so that information can be used to advocate for better services and support for Aboriginal women and families.

We know there are negative stereotypes about violence in Aboriginal families. Our aim is to ensure that the information given to us is used to benefit the community, and not used to reinforce negative stereotypes.

*You can choose to fill in the questions in this section yourself if you prefer not to talk to an interviewer about them.*

*You can also choose not to answer any of the questions. Please put a line through any of the questions you prefer not to answer.*

**In the LAST 12 MONTHS, has a partner or ex-partner ever ...**

|                                                                                                             | NEVER | ONCE | SEVERAL TIMES | A LOT |
|-------------------------------------------------------------------------------------------------------------|-------|------|---------------|-------|
| Told you that you are stupid or no good                                                                     |       |      |               |       |
| Tried to turn family, friends and children against you                                                      |       |      |               |       |
| Refused to contribute to family finances (e.g. pay bills)                                                   |       |      |               |       |
| Stopped you from connecting with your Aboriginality (e.g. going to community events, going home to Country) |       |      |               |       |
| Took money you needed for something else (e.g. bills, food)                                                 |       |      |               |       |
| Blamed their violent behaviour on you, saying it was your fault because you set them off                    |       |      |               |       |
| Pushed, grabbed, shoved you                                                                                 |       |      |               |       |
| Got wild if you spent money on yourself                                                                     |       |      |               |       |
| Got jealous or wild (doodla) if you talked to your male friends or their male friends                       |       |      |               |       |
| Hit or tried to hit you with something                                                                      |       |      |               |       |
| Got you to pay their bills                                                                                  |       |      |               |       |
| Used a knife or gun or other weapon                                                                         |       |      |               |       |
| Stopped you from leaving the house                                                                          |       |      |               |       |
| Took your money and made you worry about not having enough                                                  |       |      |               |       |
| Threatened to hurt you, your family or your pets                                                            |       |      |               |       |
| Forced you to do something you didn't want to do sexually                                                   |       |      |               |       |
| Smashed up or destroyed your things                                                                         |       |      |               |       |
| Made you ask for money for bills, food or the kids                                                          |       |      |               |       |

**If you have NOT had any of these experiences IN THE PAST 12 MONTHS, please skip the next question.**

When these things happened, what did you do to protect yourself and stay strong?

|                                              | YES | NO |
|----------------------------------------------|-----|----|
| Left the house                               |     |    |
| Took the kids to stay with family or friends |     |    |
| Phoned police                                |     |    |
| Got intervention order                       |     |    |
| Changed phone number                         |     |    |
| Talked to family about it                    |     |    |
| Talked to friend about it                    |     |    |
| Talked to doctor about it                    |     |    |
| Talked to an Aboriginal Health Worker        |     |    |
| Talked to a counsellor/psychologist          |     |    |
| Other (please describe) _____<br>_____       |     |    |

**Access to the scale:**

The *Aboriginal Women's Experience of Partner Violence Scale* (AEPVS) may not be reproduced without permission. There is no fee to use this scale, but permission must be obtained from the Aboriginal Families Study Aboriginal Advisory Group Executive.

Please contact:

Karen Glover (karen.glover@sahmri.com)

Stephanie Brown (stephanie.brown@mcri.edu.au)
